# Supplementary material for: Synthesis and Characterization of Fatty Acid Grafted Chitosan Polymeric Micelles for Improved Gene Delivery of VGF to the Brain through Intranasal Route
Source: MDPI journal article supplement (doi:10.3390/biomedicines10020493), 2022-02-19
Supplement: s1 [file s1]

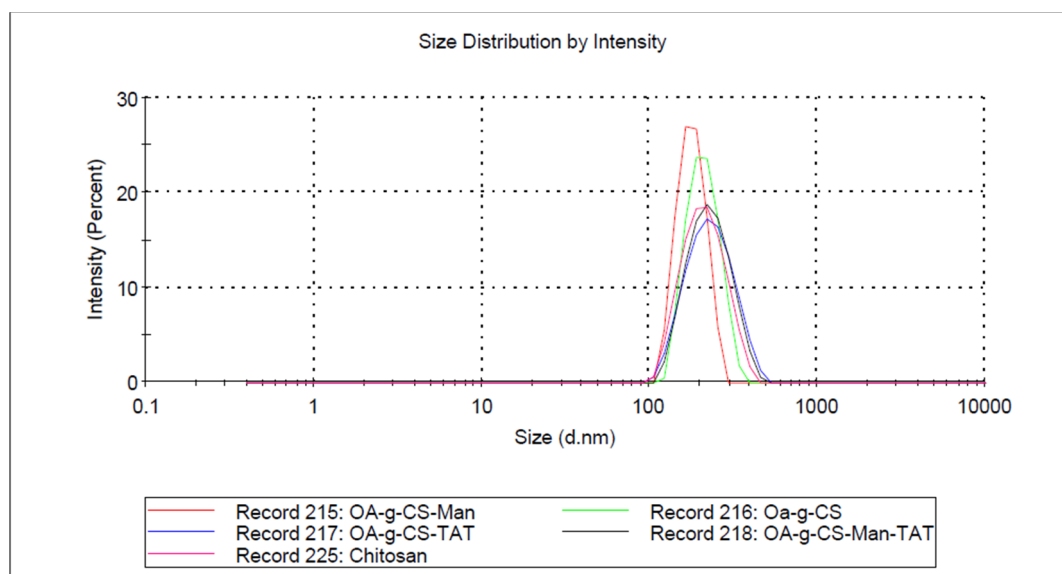

**Figure S1.** Particle size distribution for different chitosan polymer formulations using dynamic light scattering method.

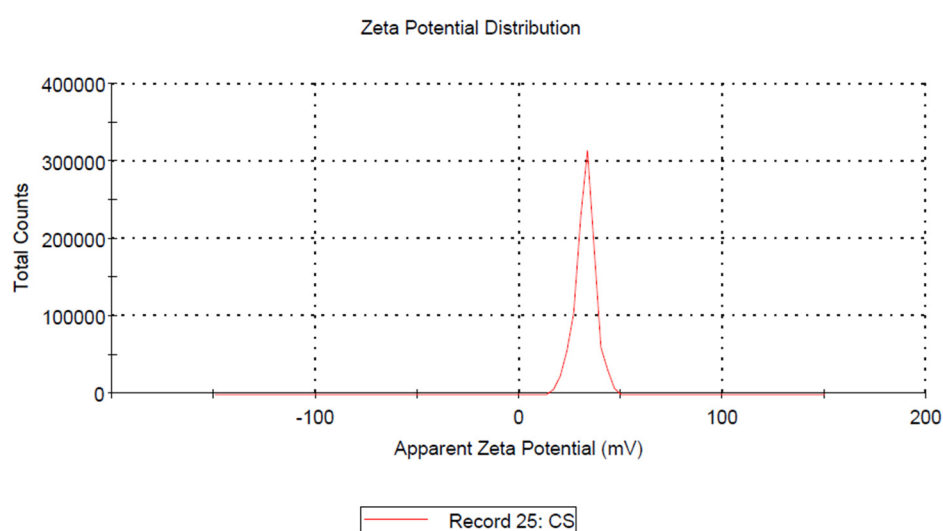

**Figure S2.** Zeta potential distribution for chitosan using dynamic light scattering method.

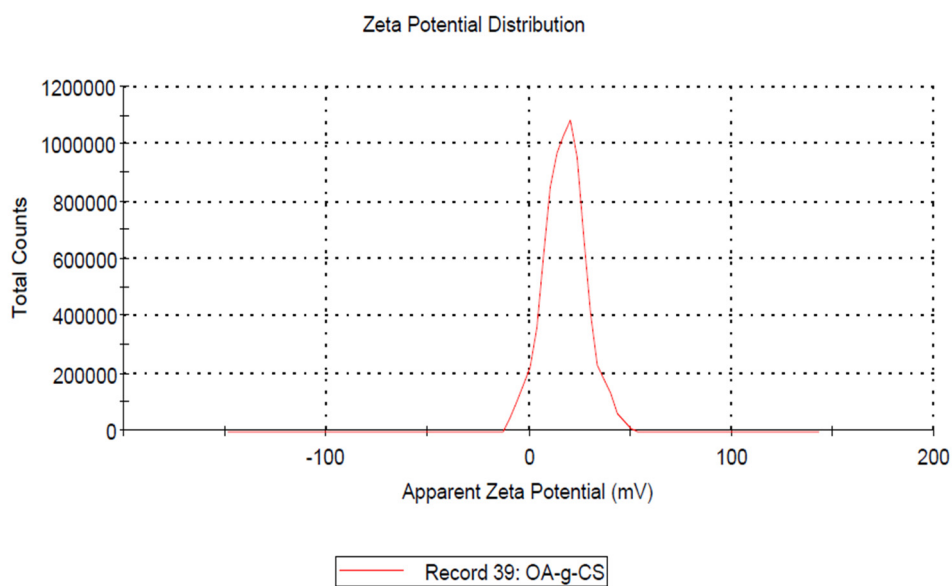

**Figure S3.** Zeta potential distribution for Oleic acid grafted chitosan using dynamic light scattering method.

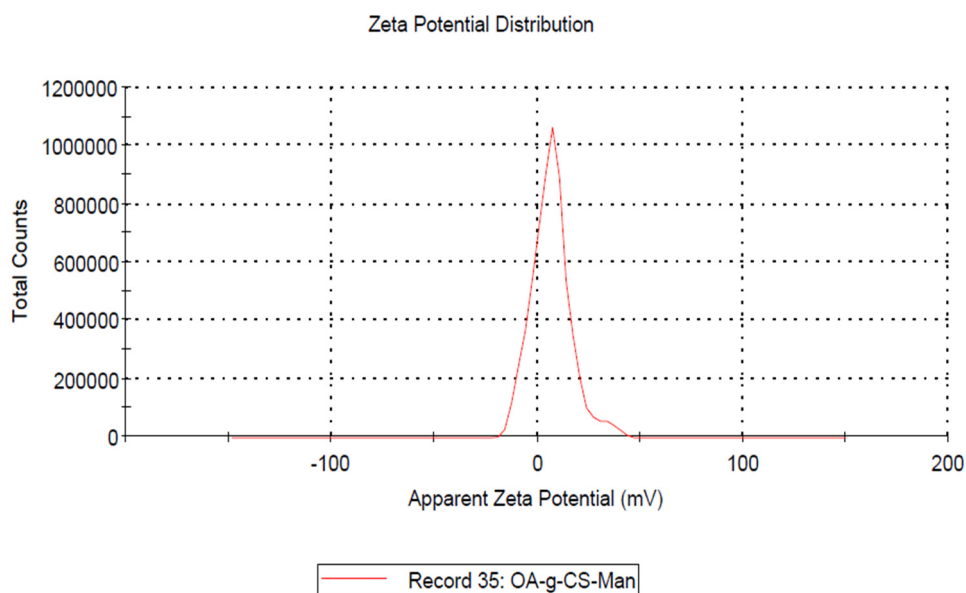

**Figure S4.** Zeta potential distribution for OA-g-CS-Man using dynamic light scattering method.

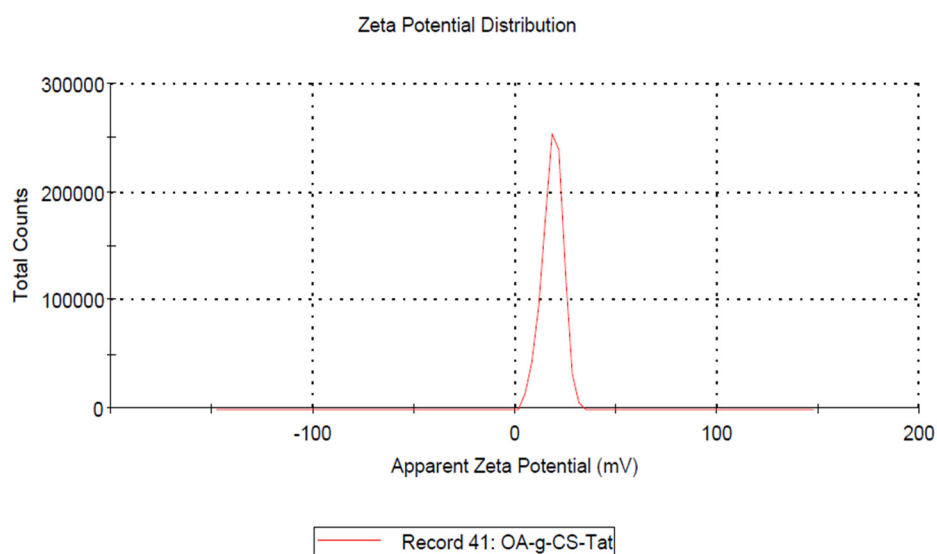

**Figure S5.** Zeta potential distribution for OA-g-CS-Tat using dynamic light scattering method.

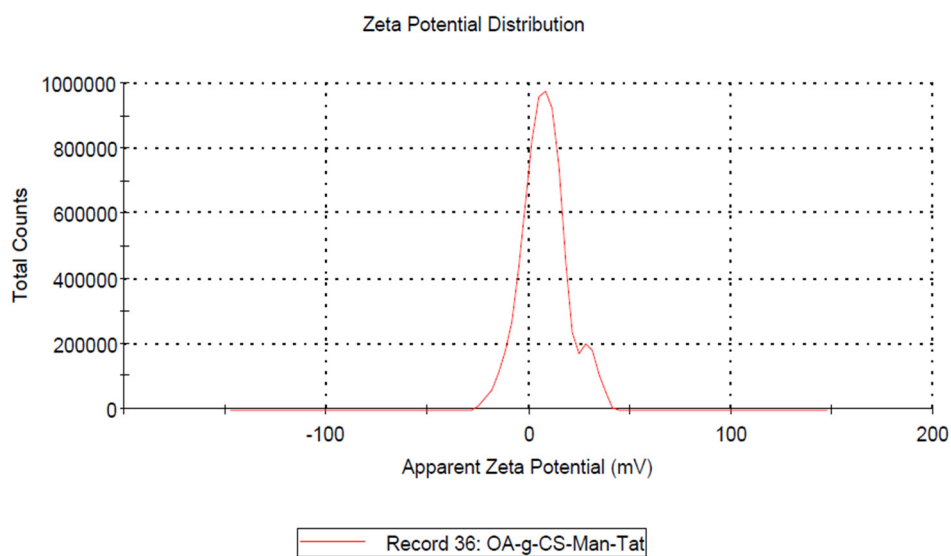

**Figure S6.** Zeta potential distribution for OA-g-CS-Man-Tat using dynamic light scattering method.

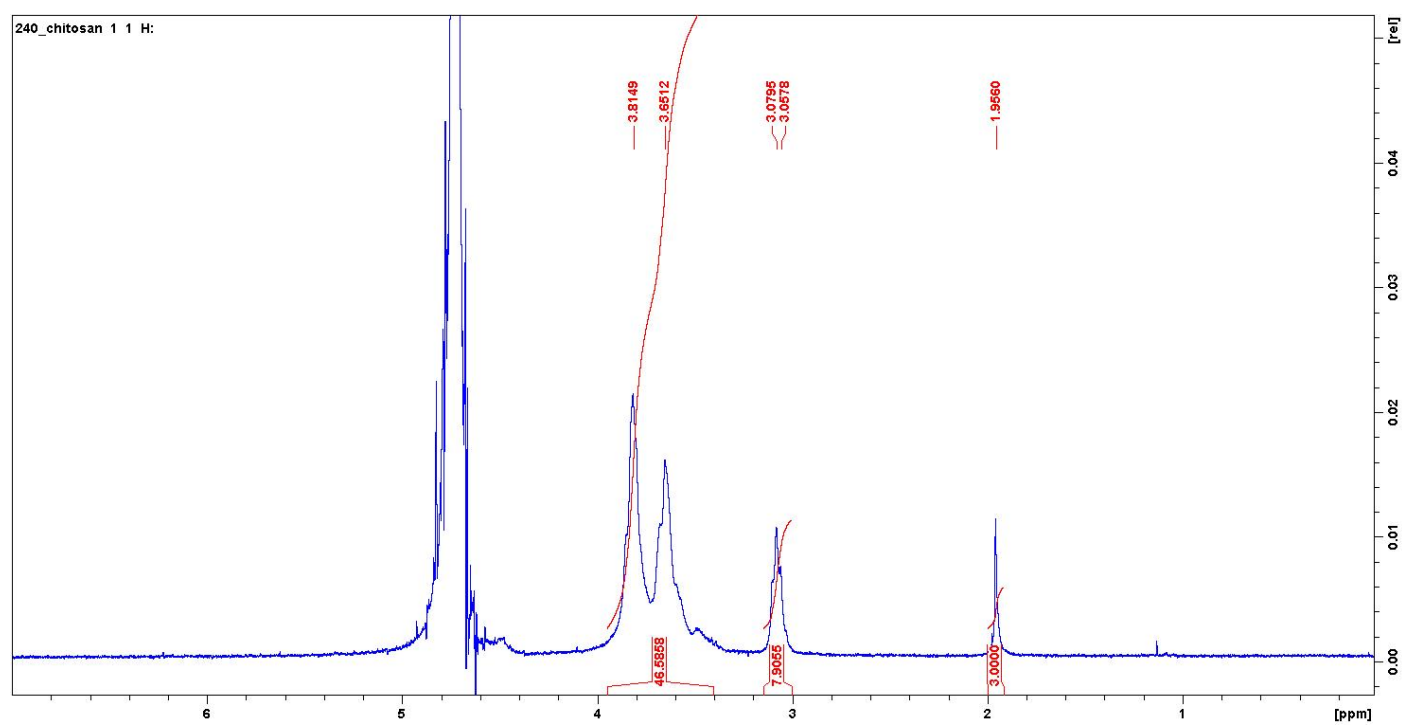Figure S7.  $^1\text{H}$ NMR of Chitosan.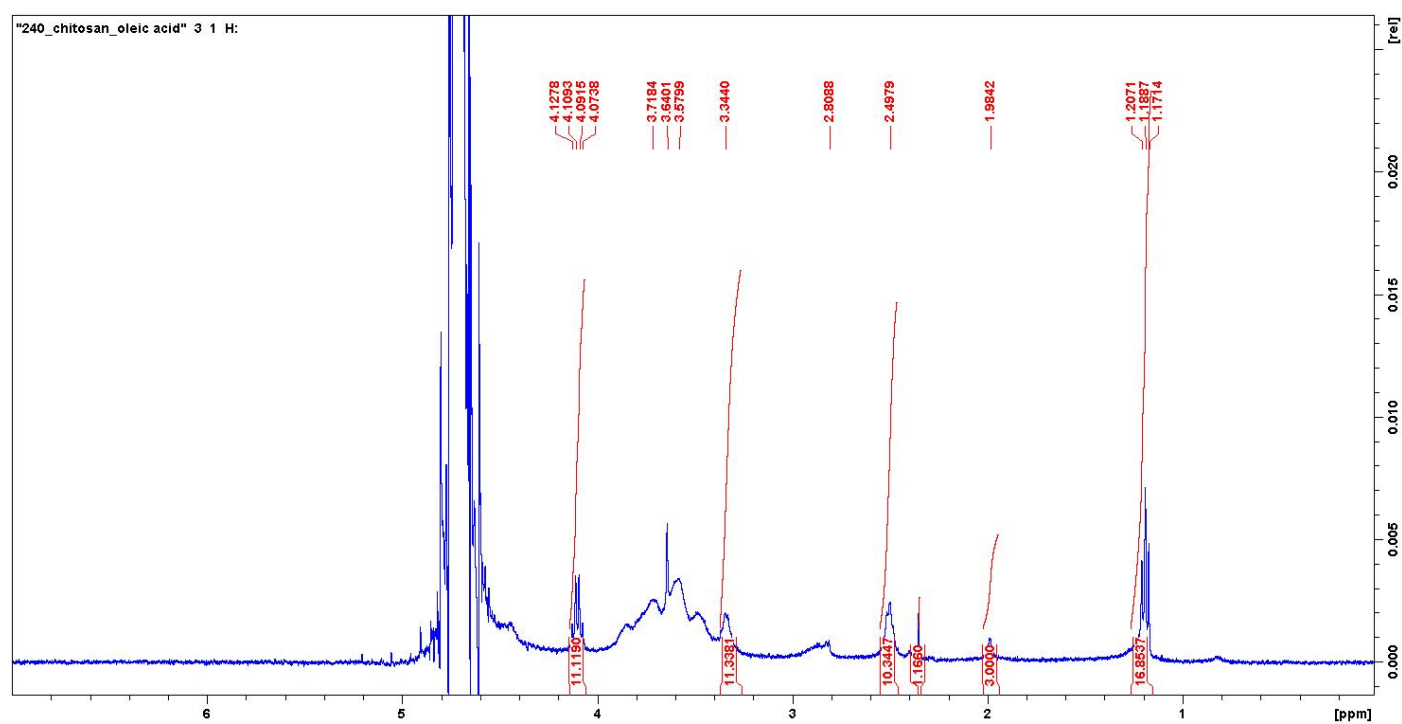Figure S8.  $^1\text{H}$ NMR of OA-g-CS.

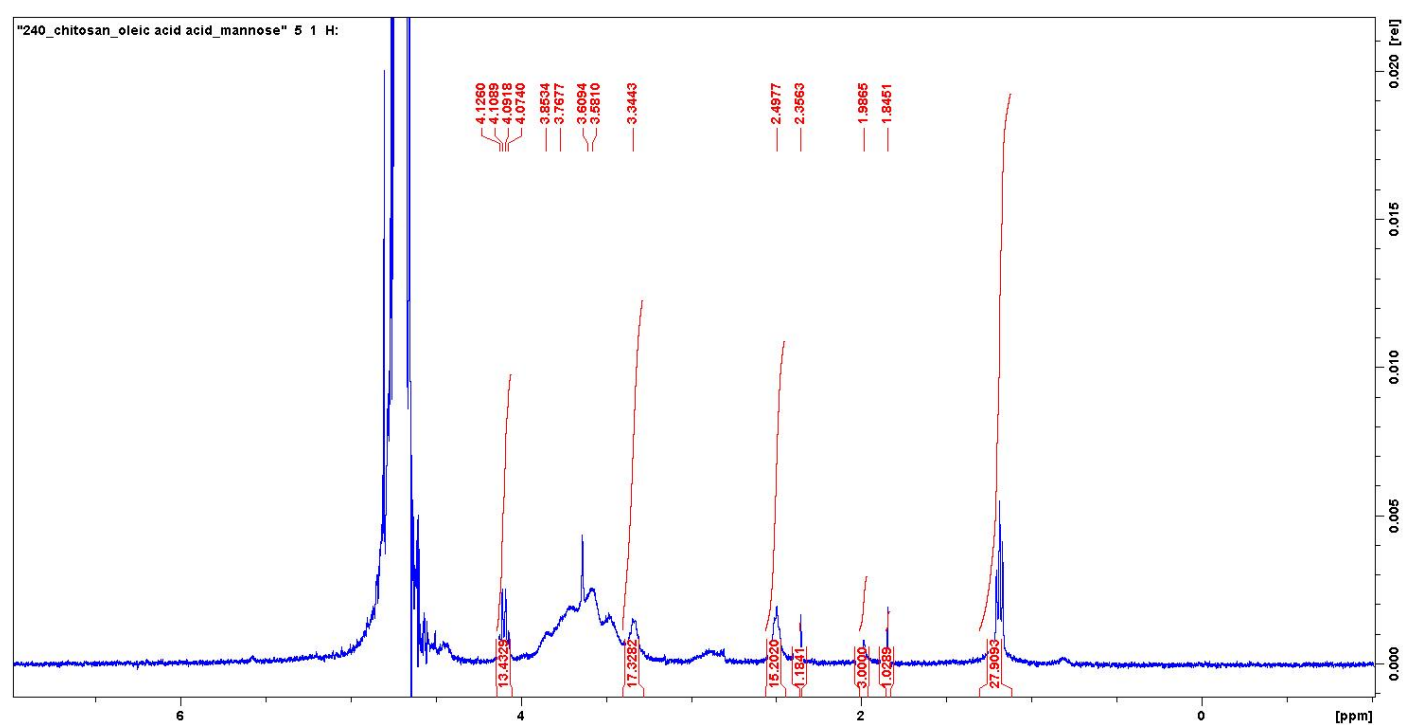Figure S9. <sup>1</sup>H NMR of OA-g-CS-Man.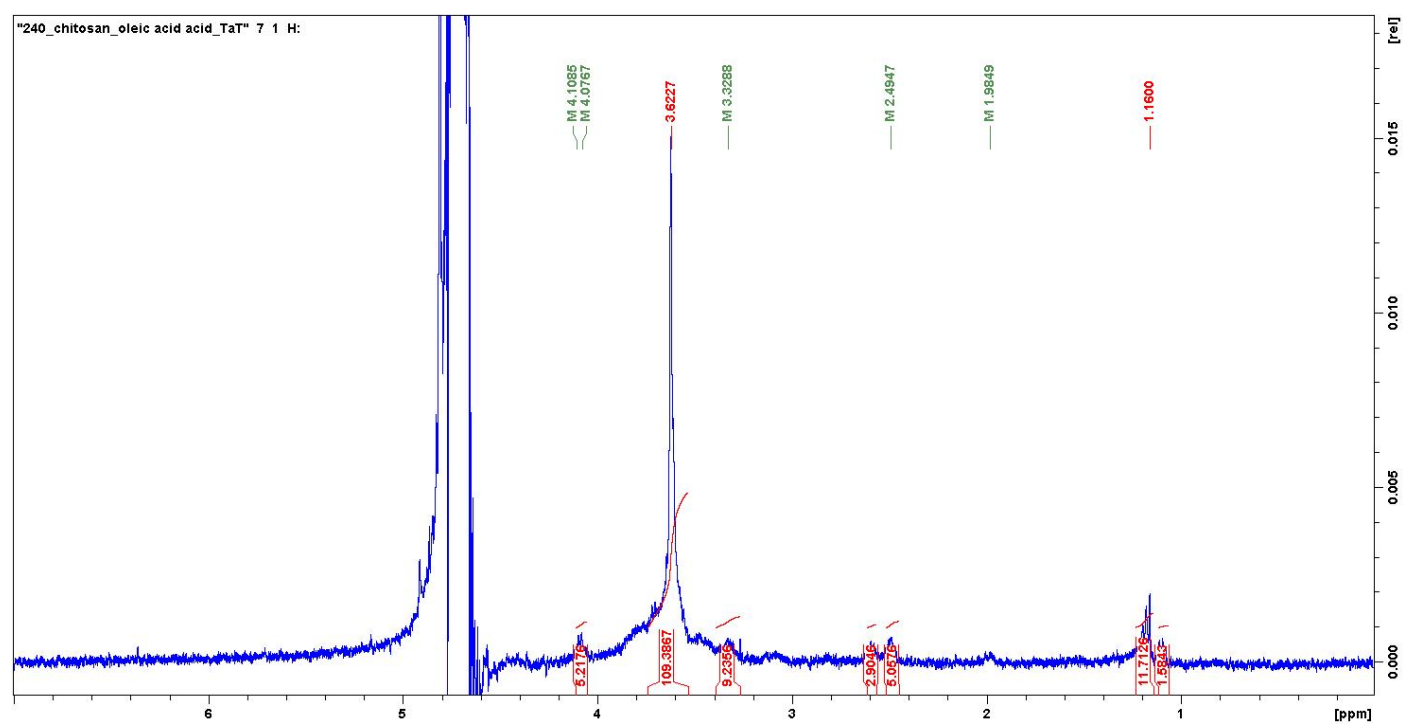Figure S10. <sup>1</sup>H NMR of OA-g-CS-Tat.

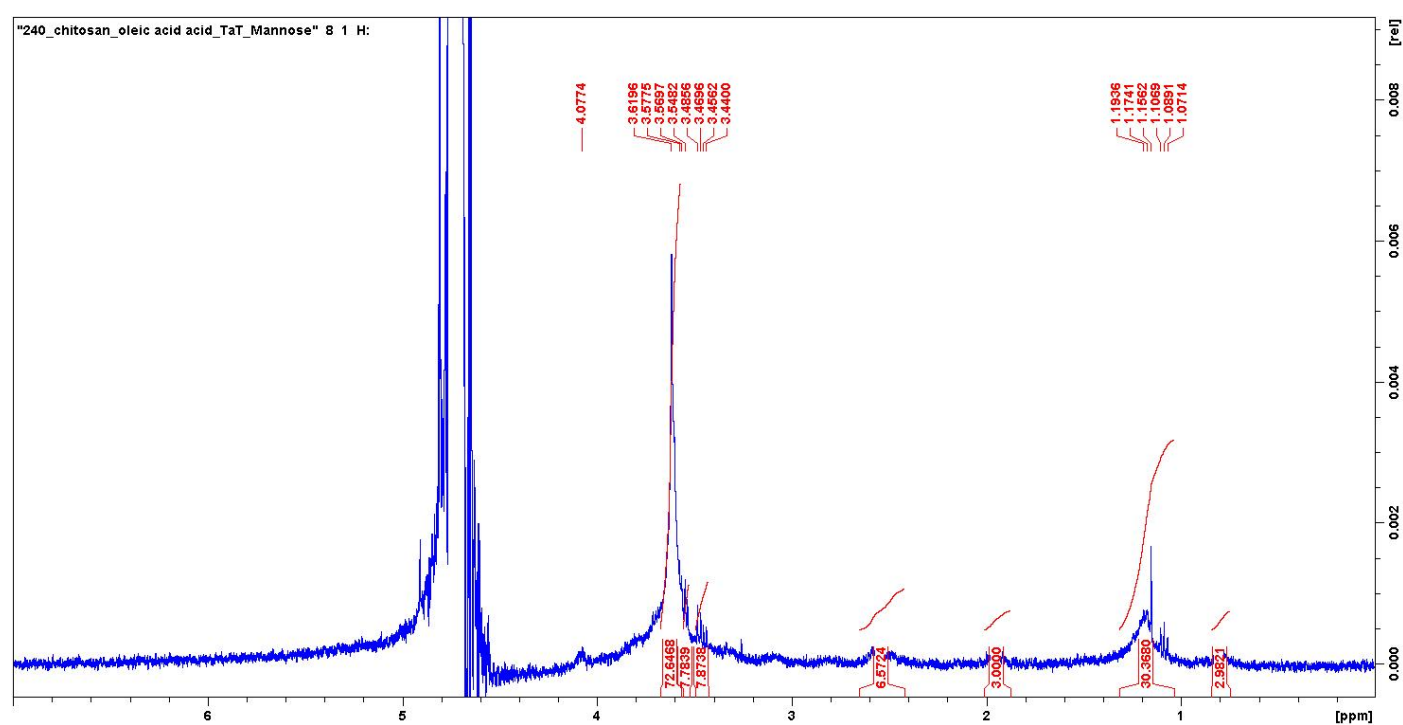Figure S11. <sup>1</sup>H NMR of OA-g-CS-Man-Tat.

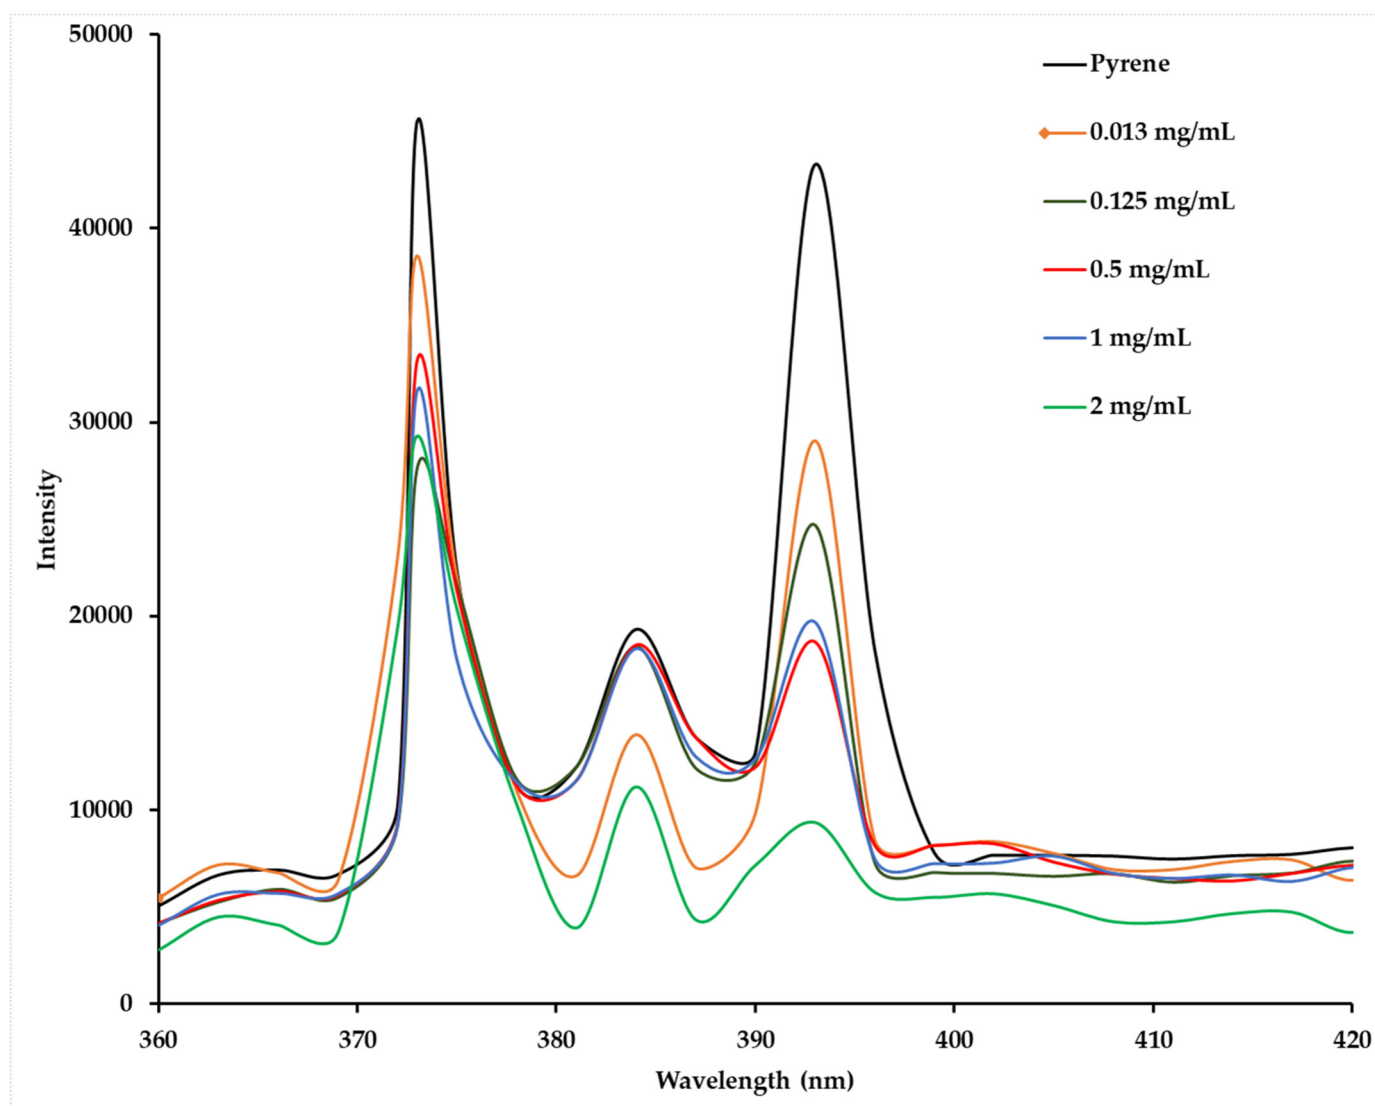

**Figure S12.** Fluorescence spectra of hydrophobic probe pyrene with increasing concentration of CS-g-OA.
